# Supplementary figures and images for: Dendritic cell CD83 homotypic interactions regulate inflammation and promote mucosal homeostasis
Source: PubMed Central journal article supplement — Mucosal Immunol. 2014 Sep 10;8(2):414–28. doi: 10.1038/mi.2014.79 (PMC4326976; doi:10.1038/mi.2014.79), 2014-09-10

Supplemental Figure 1. CKO targeting strategy.

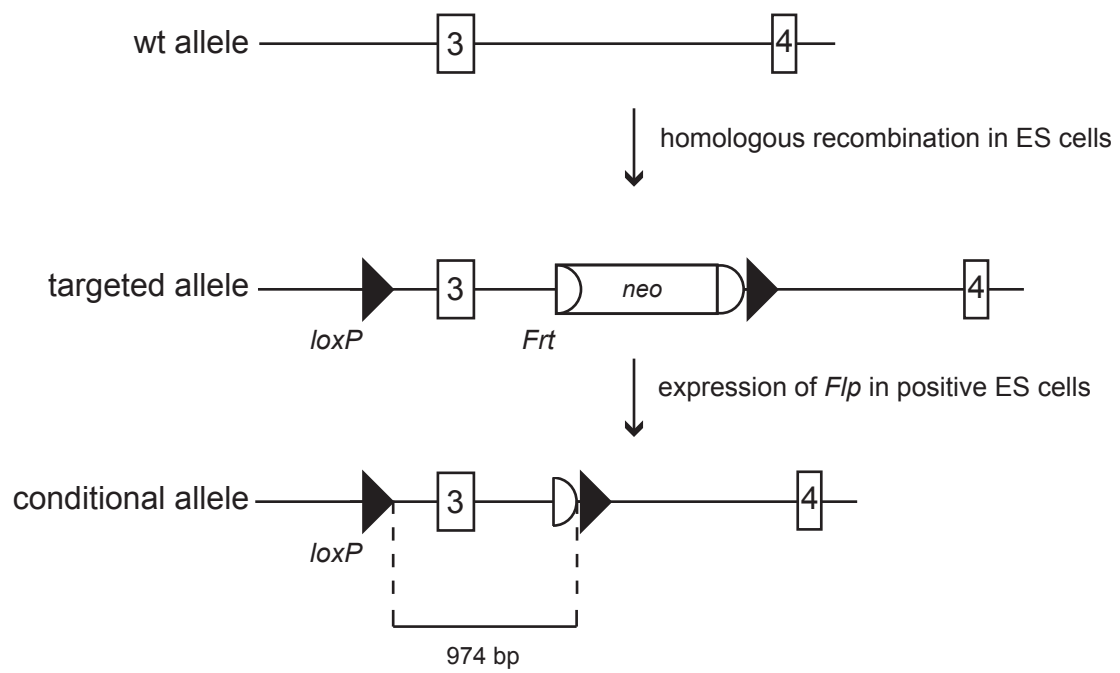

Supplement: mi201479x1.pdf [file mi201479x1.pdf]

Supplemental figure 10. CD83 inhibits mouse IL-12p40 expression

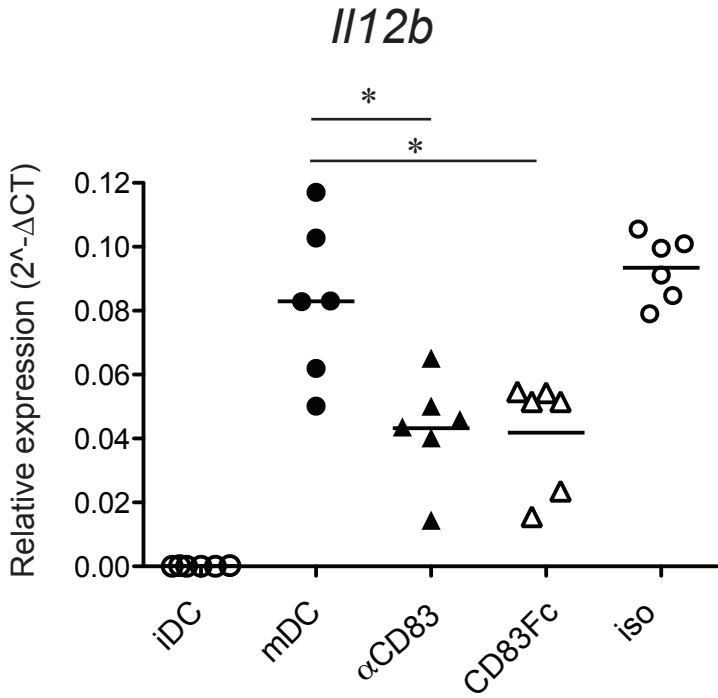

Supplement: mi201479x10.pdf [file mi201479x10.pdf]

**a**

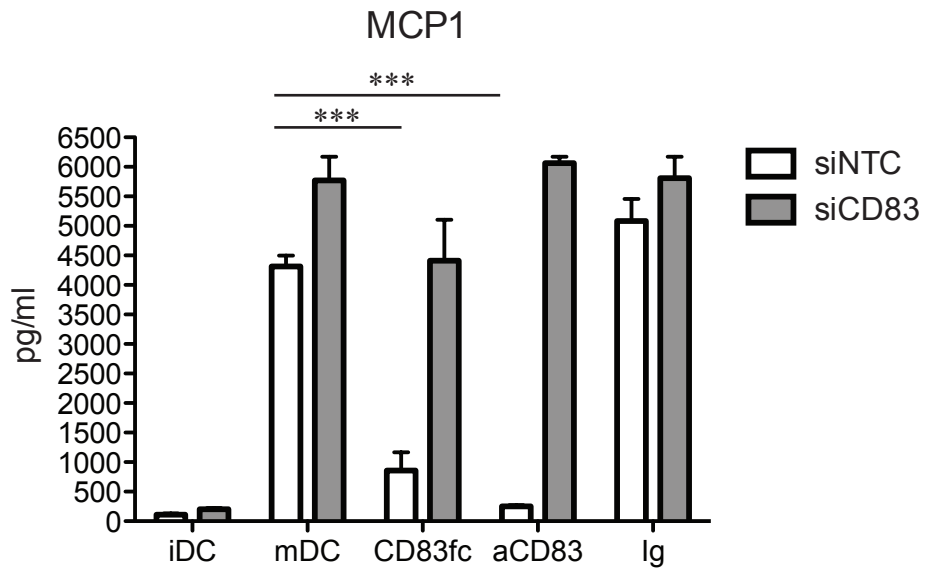

**b**

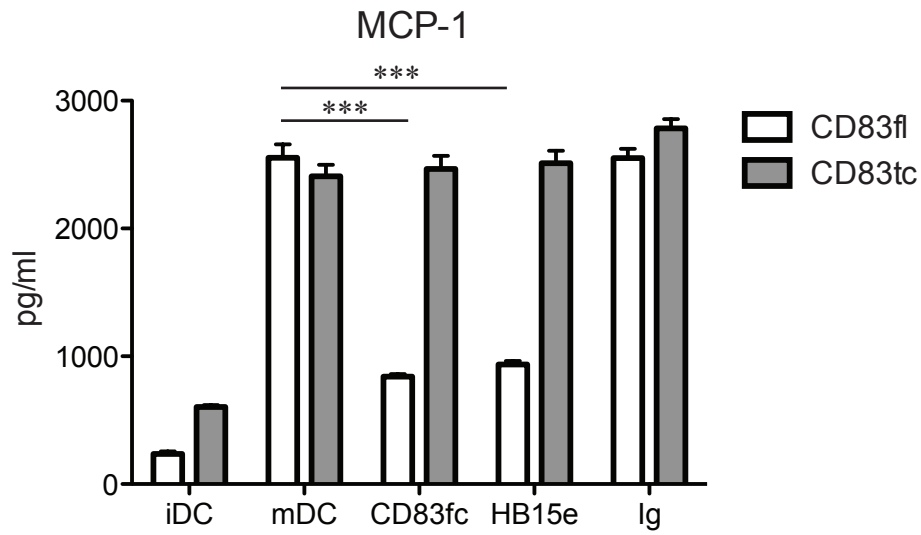

**c**

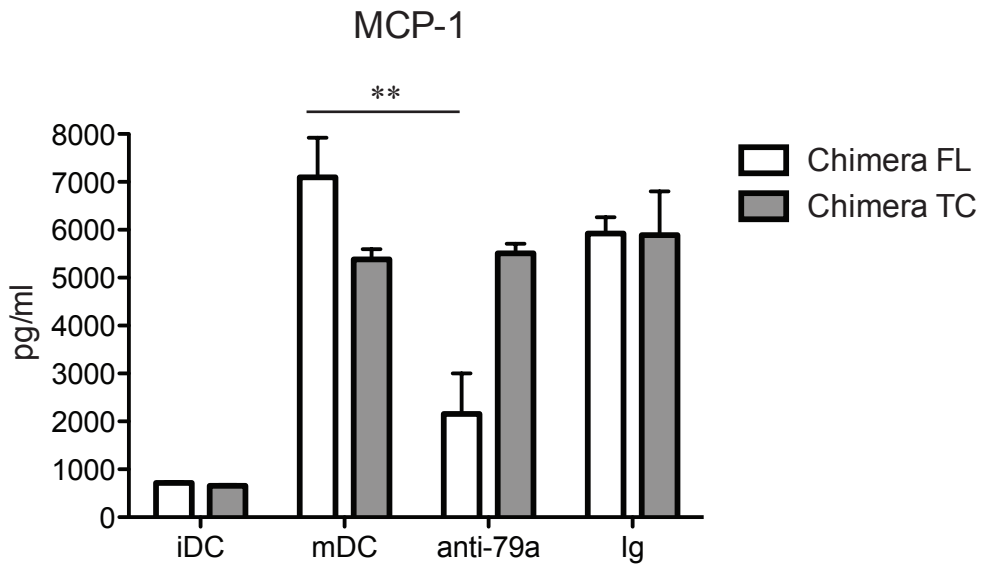

Supplement: mi201479x11.pdf [file mi201479x11.pdf]

Supplemental figure 12. CD83 treatment affects p38 MAPK pathway activation

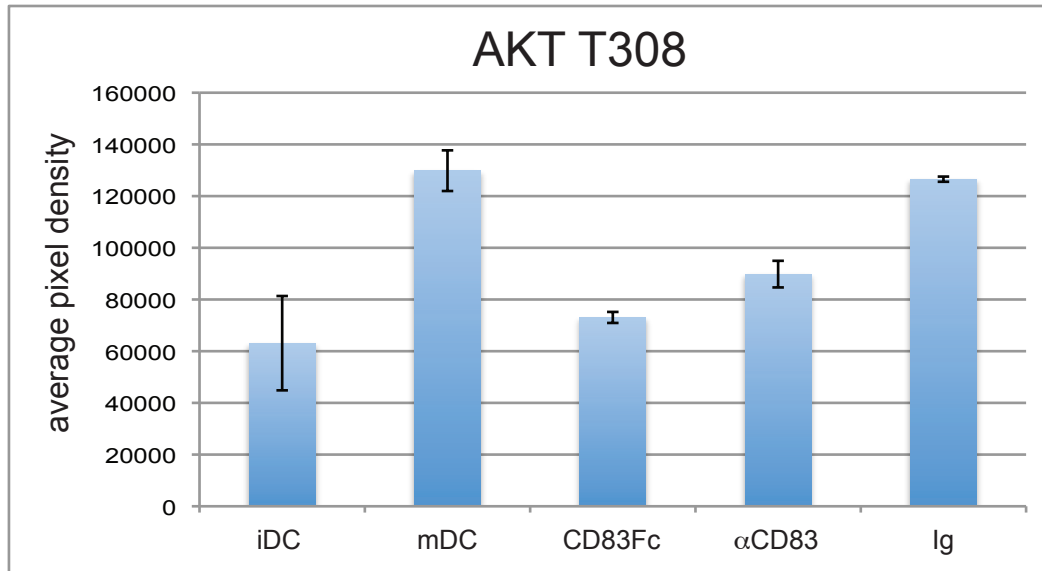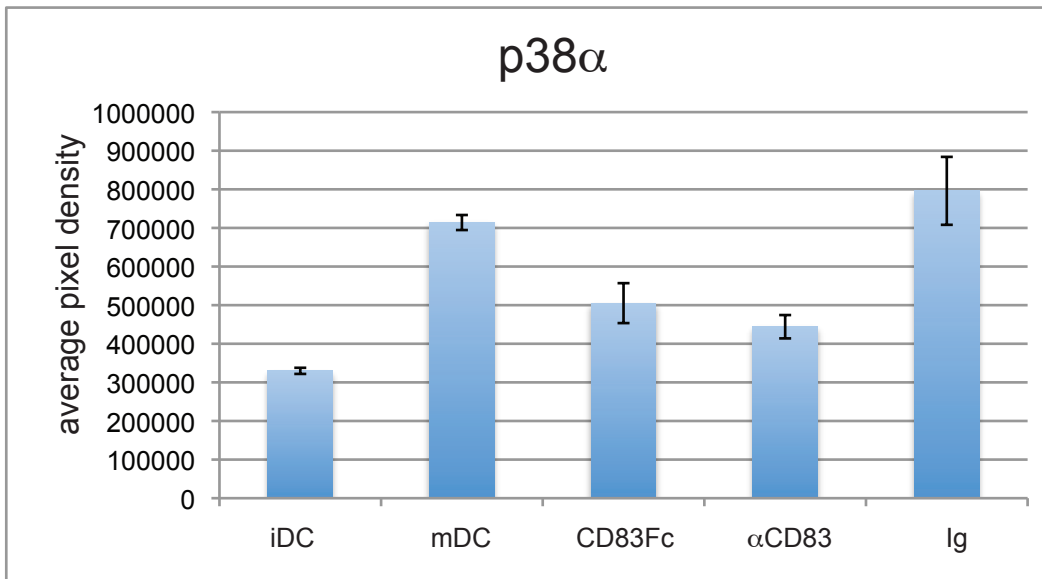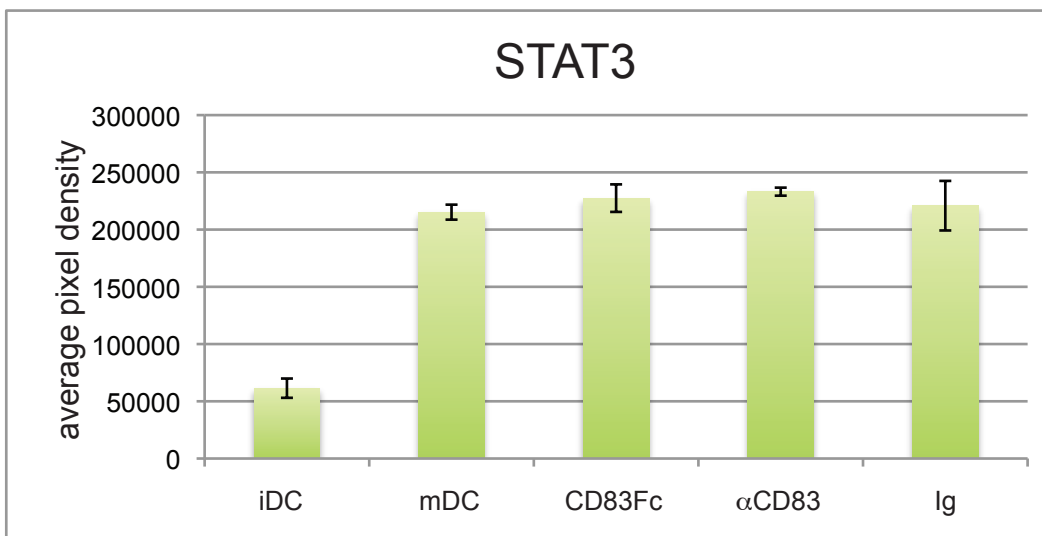

Supplement: mi201479x12.pdf [file mi201479x12.pdf]

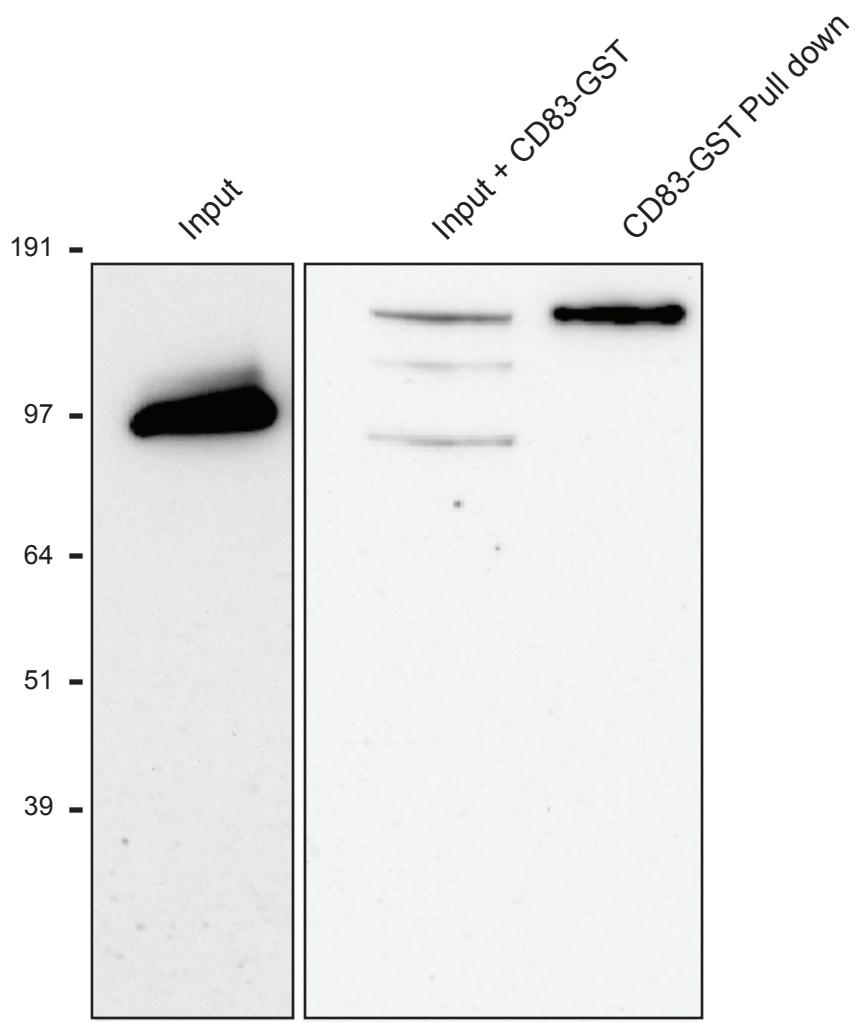

Supplement: mi201479x13.pdf [file mi201479x13.pdf]

**a**

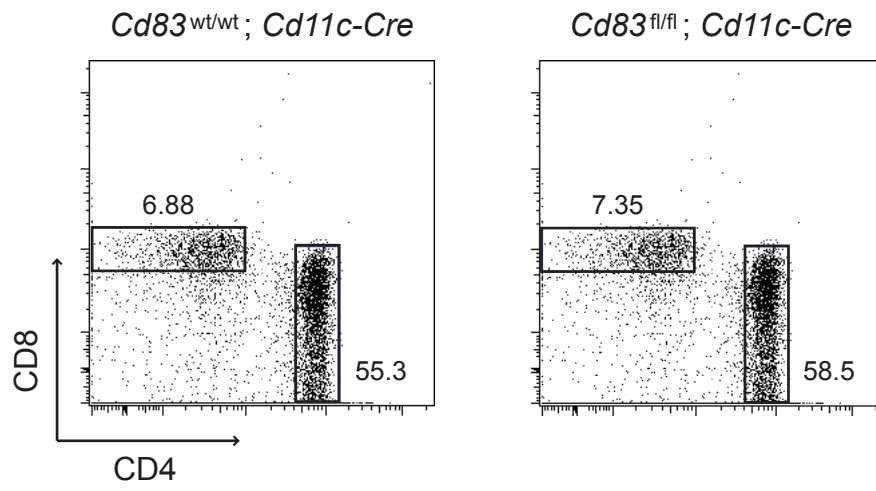

**b**

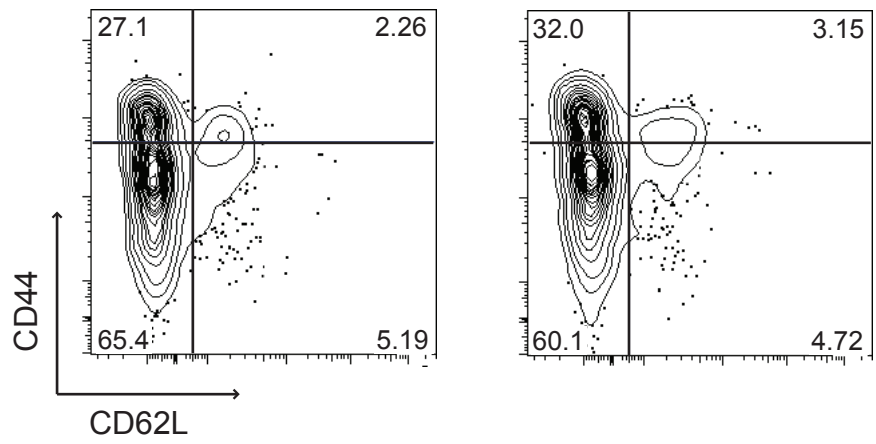

**c**

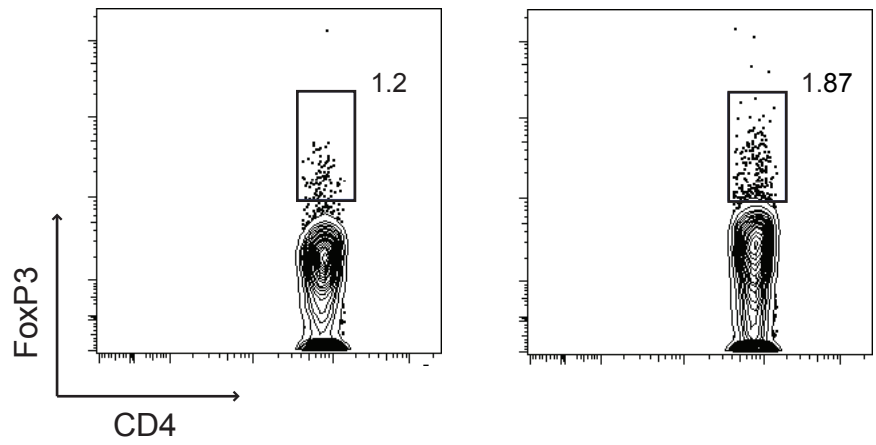

Supplement: mi201479x2.pdf [file mi201479x2.pdf]

Supplemental figure 3. CD83 is expressed on all DC subsets in the colon lamina propria

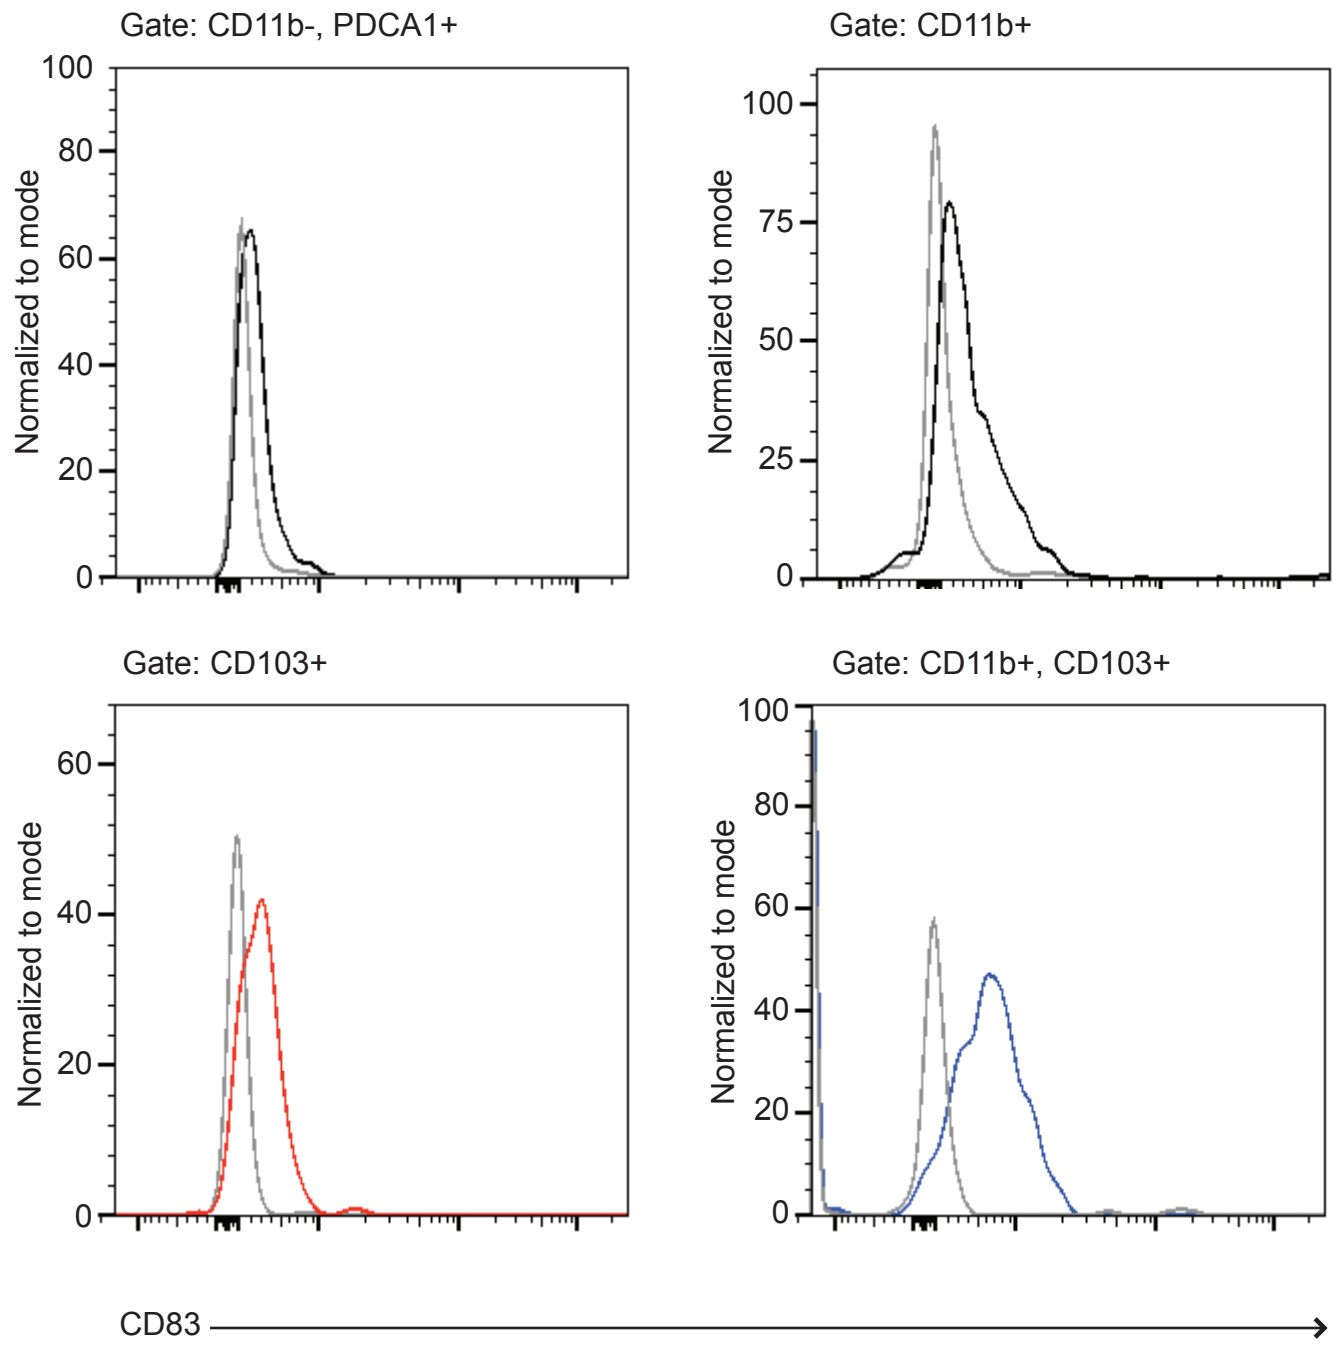

Supplement: mi201479x3.pdf [file mi201479x3.pdf]

Supplementary figure 4. gating strategy and CD83Tg has no effect on DC subsets

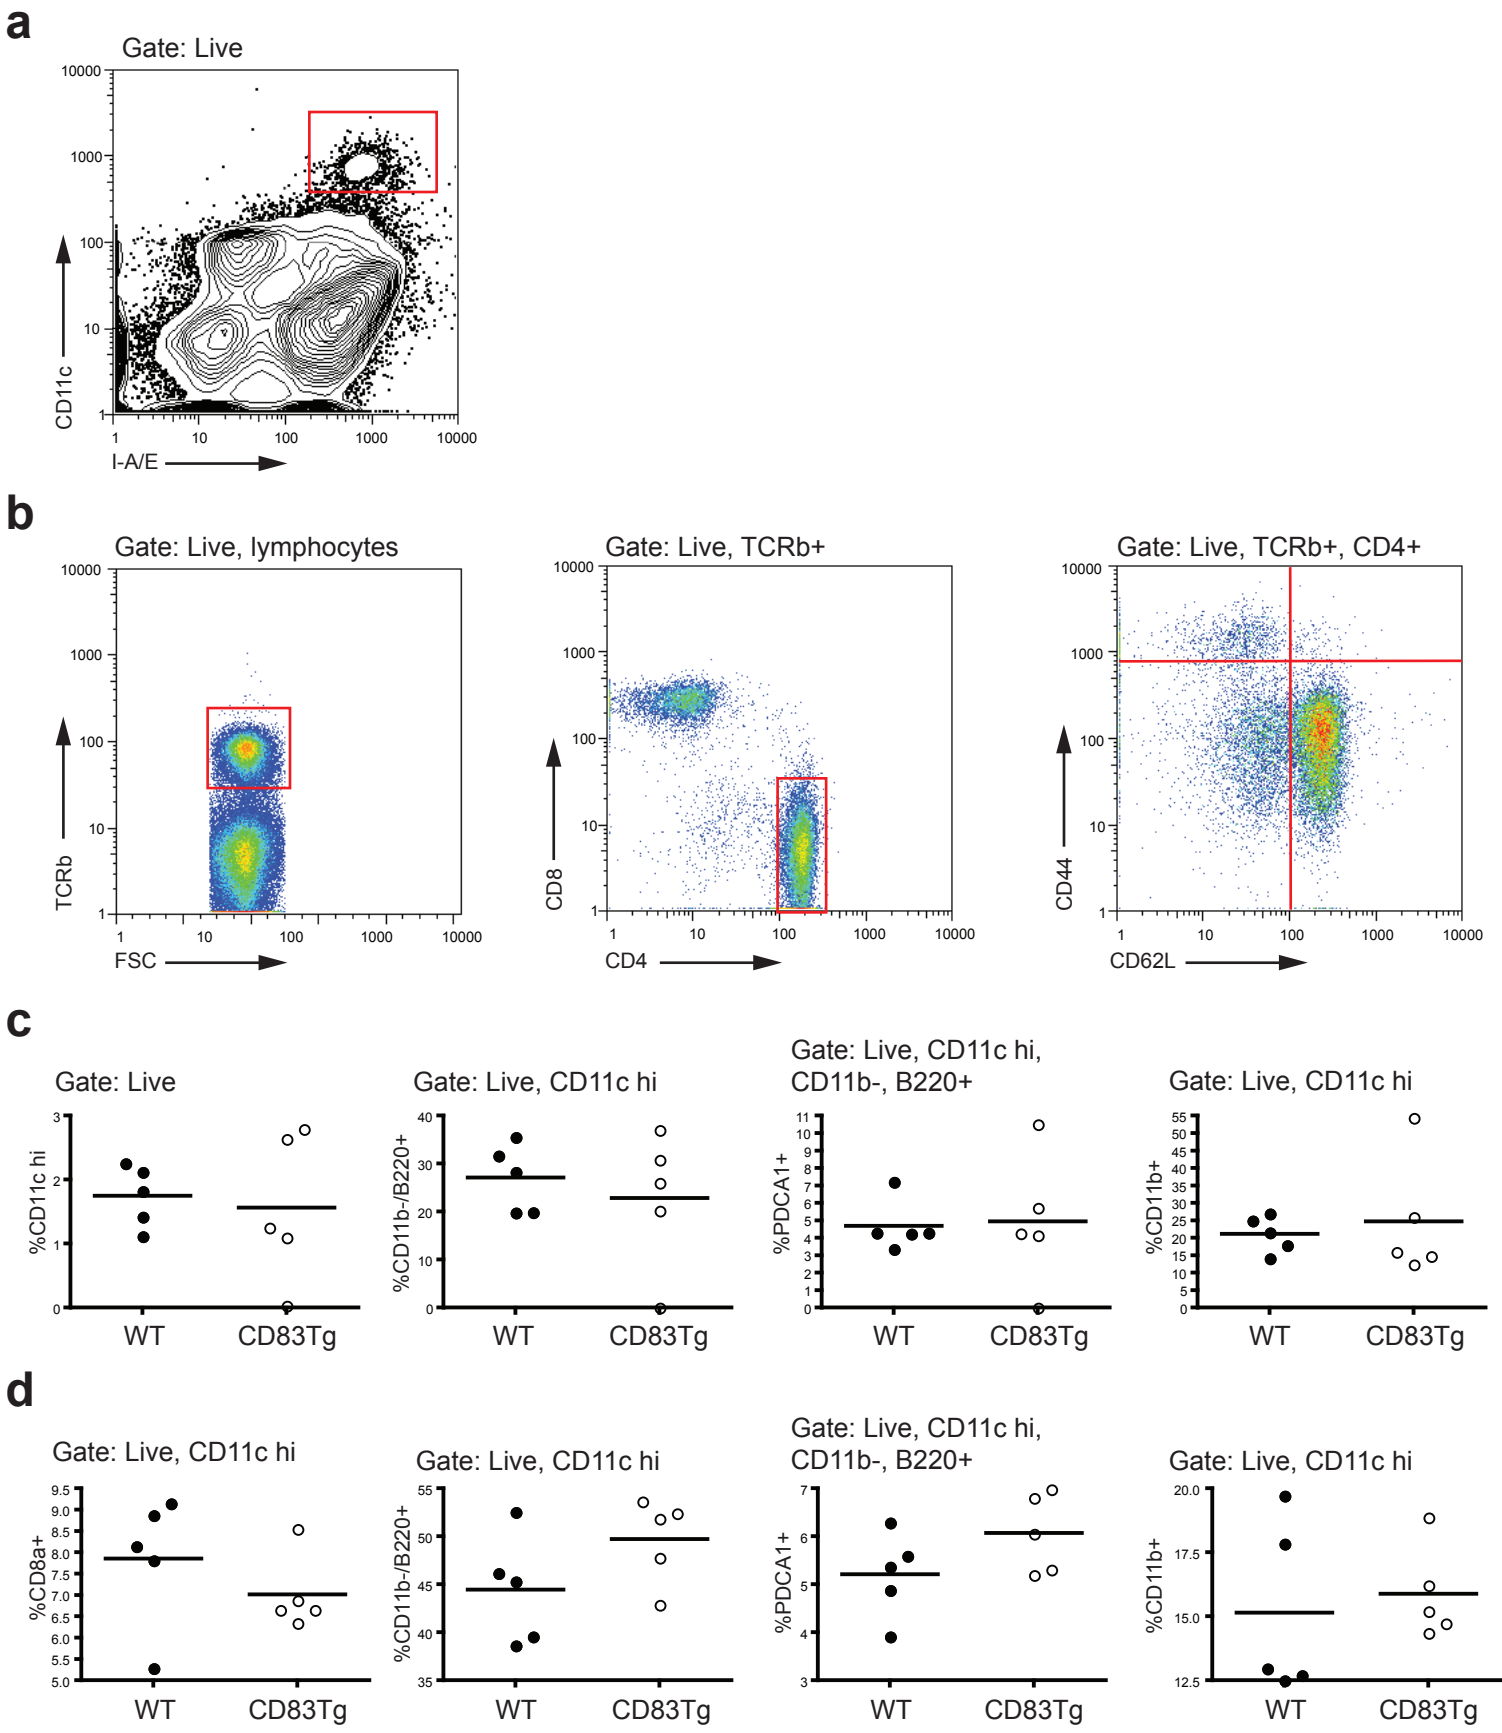

Supplement: mi201479x4.pdf [file mi201479x4.pdf]

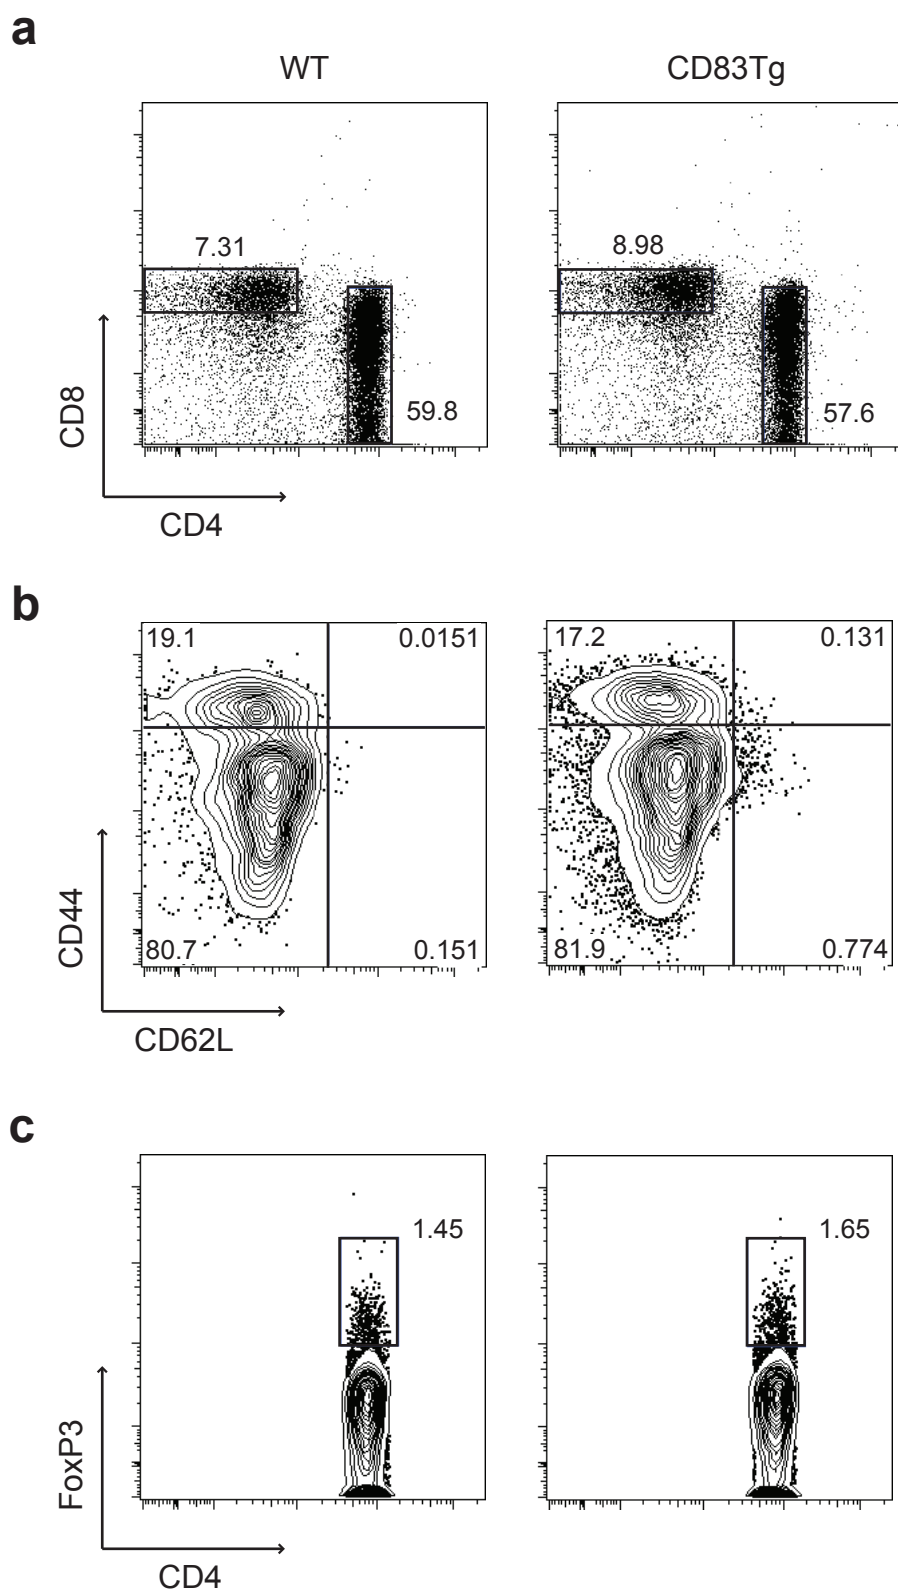

Supplement: mi201479x5.pdf [file mi201479x5.pdf]

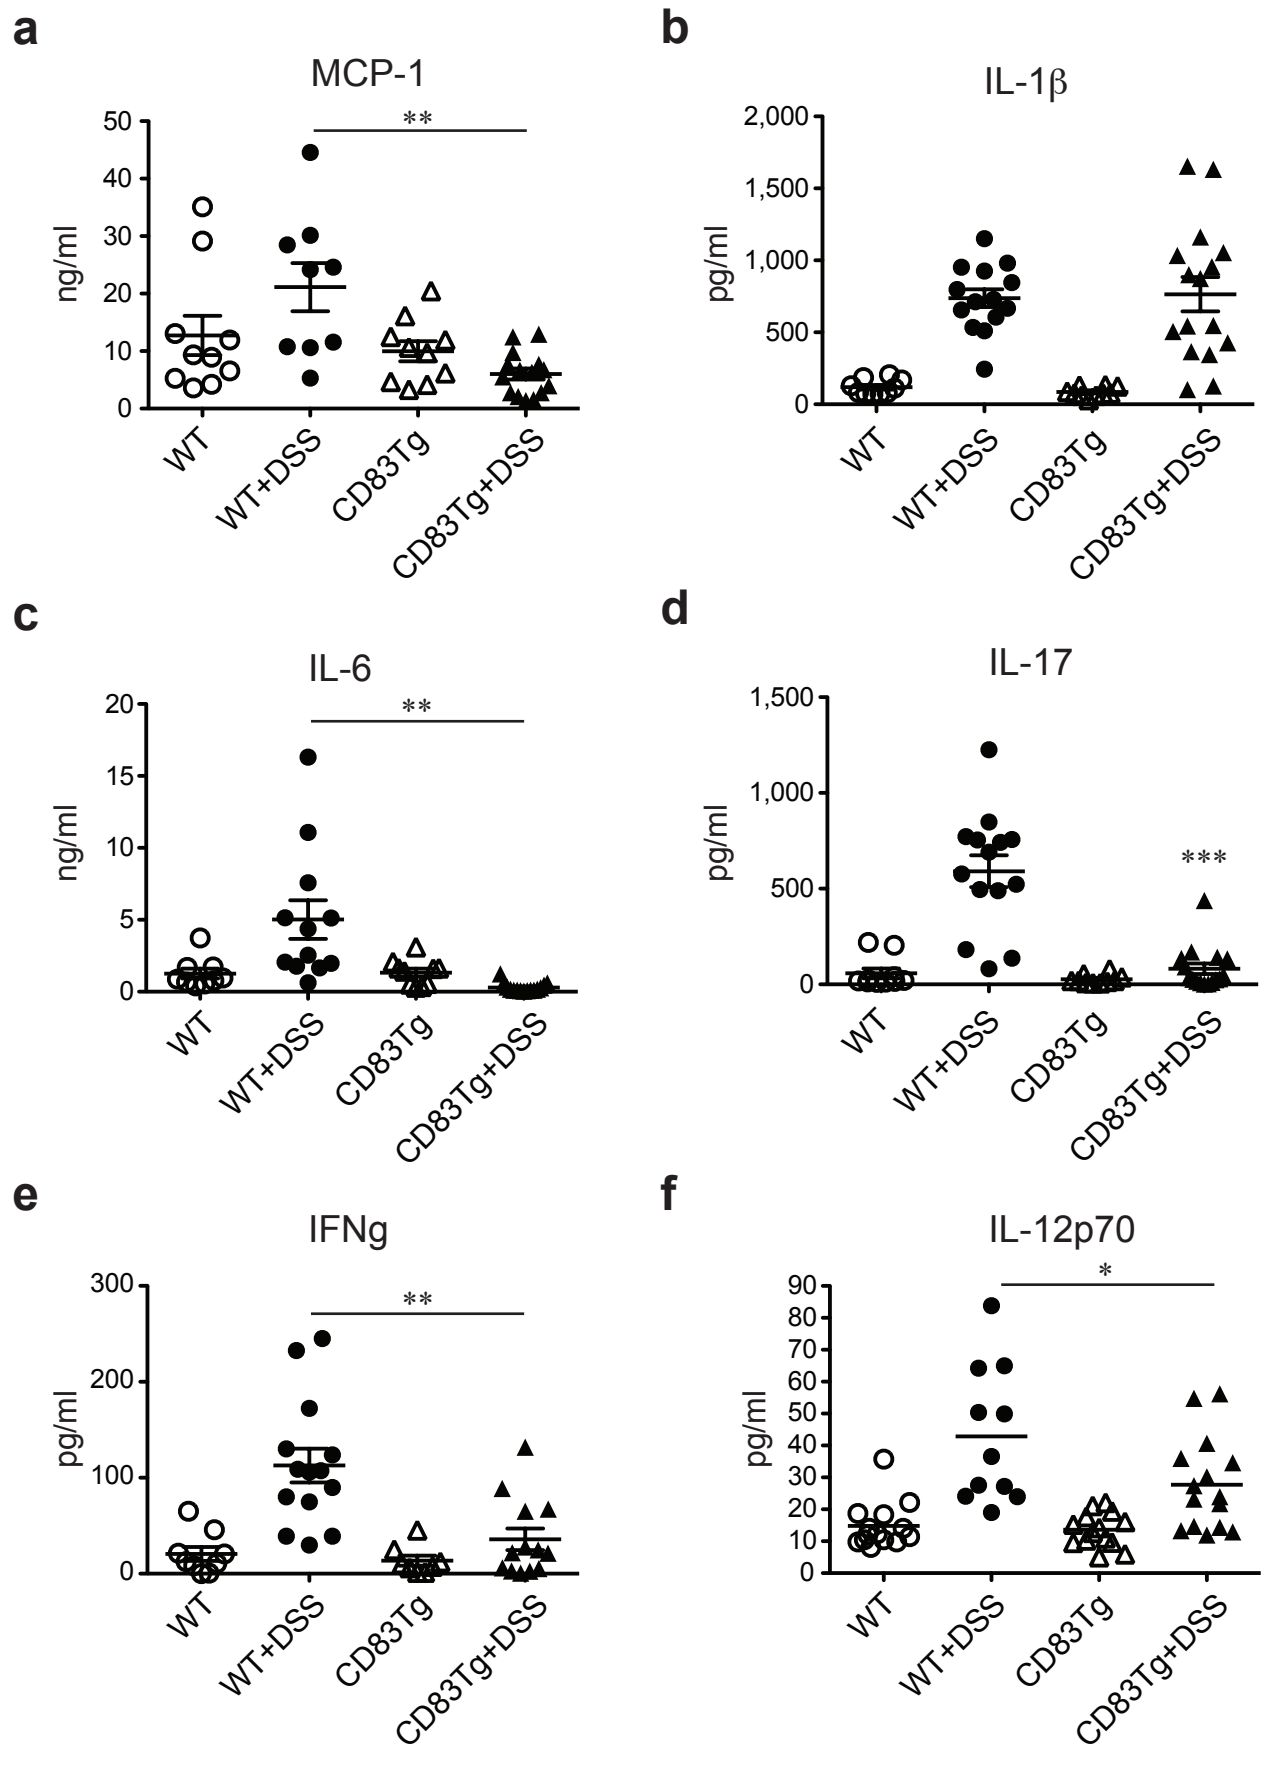

Supplement: mi201479x6.pdf [file mi201479x6.pdf]

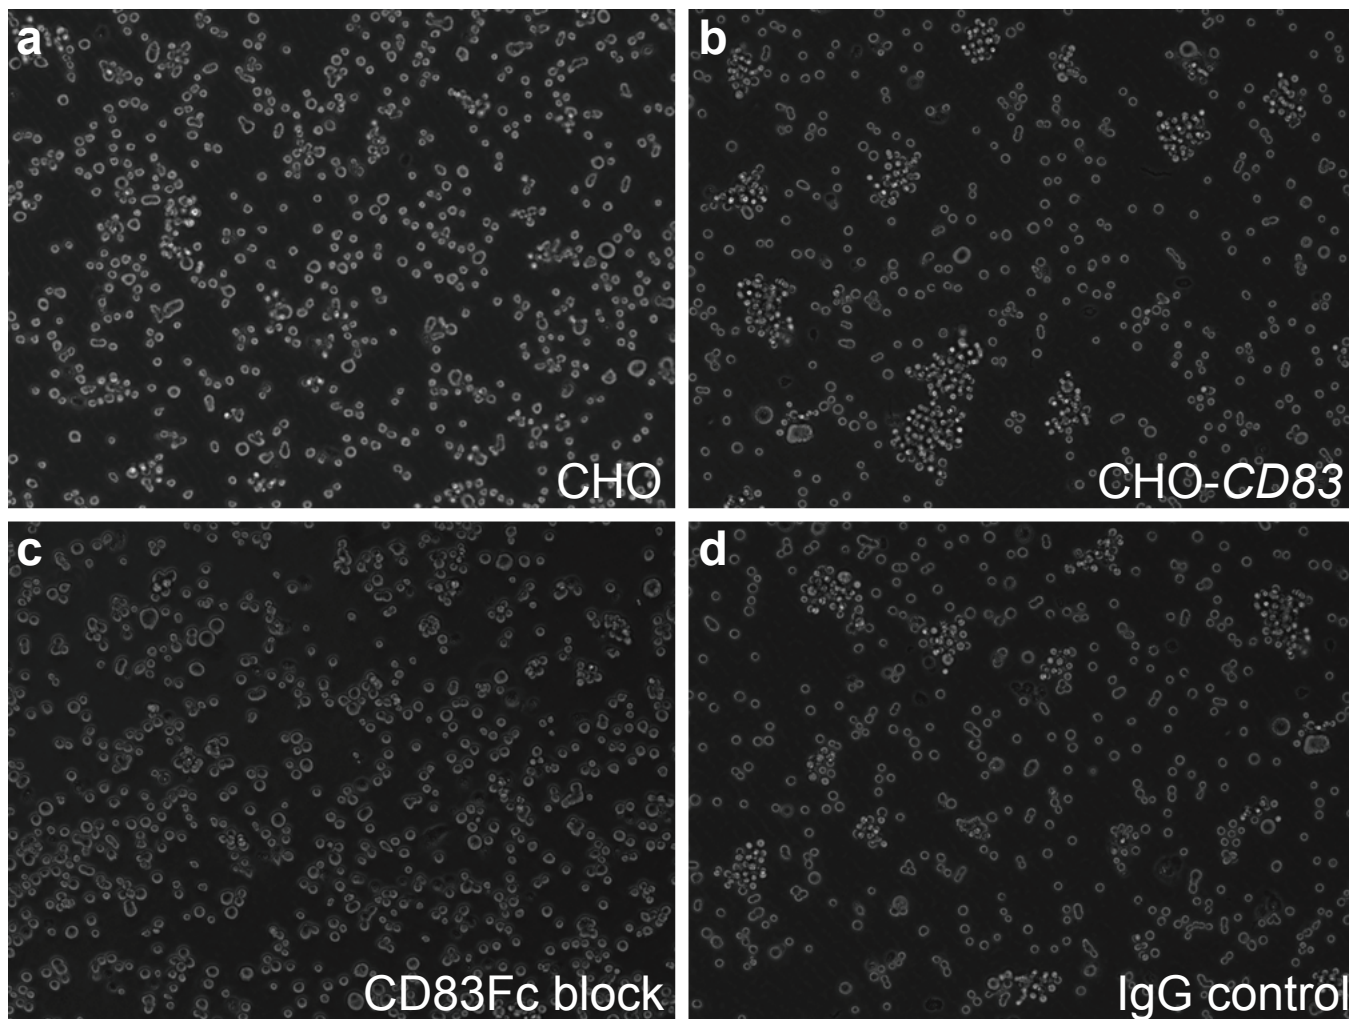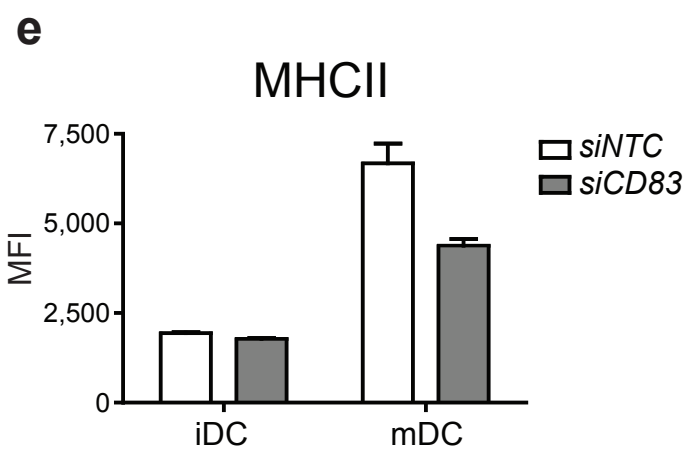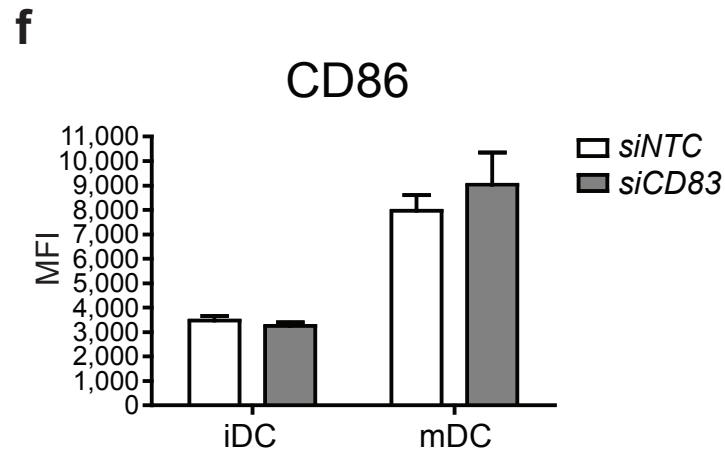

Supplement: mi201479x7.pdf [file mi201479x7.pdf]

Supplemental figure 8. CD83 siRNA knockdown

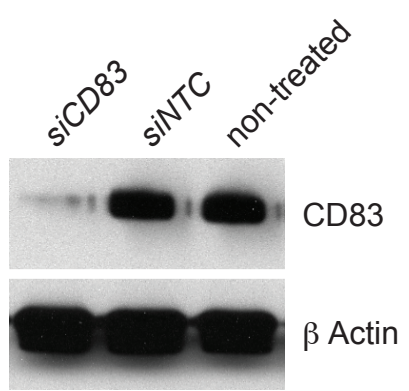

Supplement: mi201479x8.pdf [file mi201479x8.pdf]

Supplemental figure 9. CD83 inhibits MDDC activation

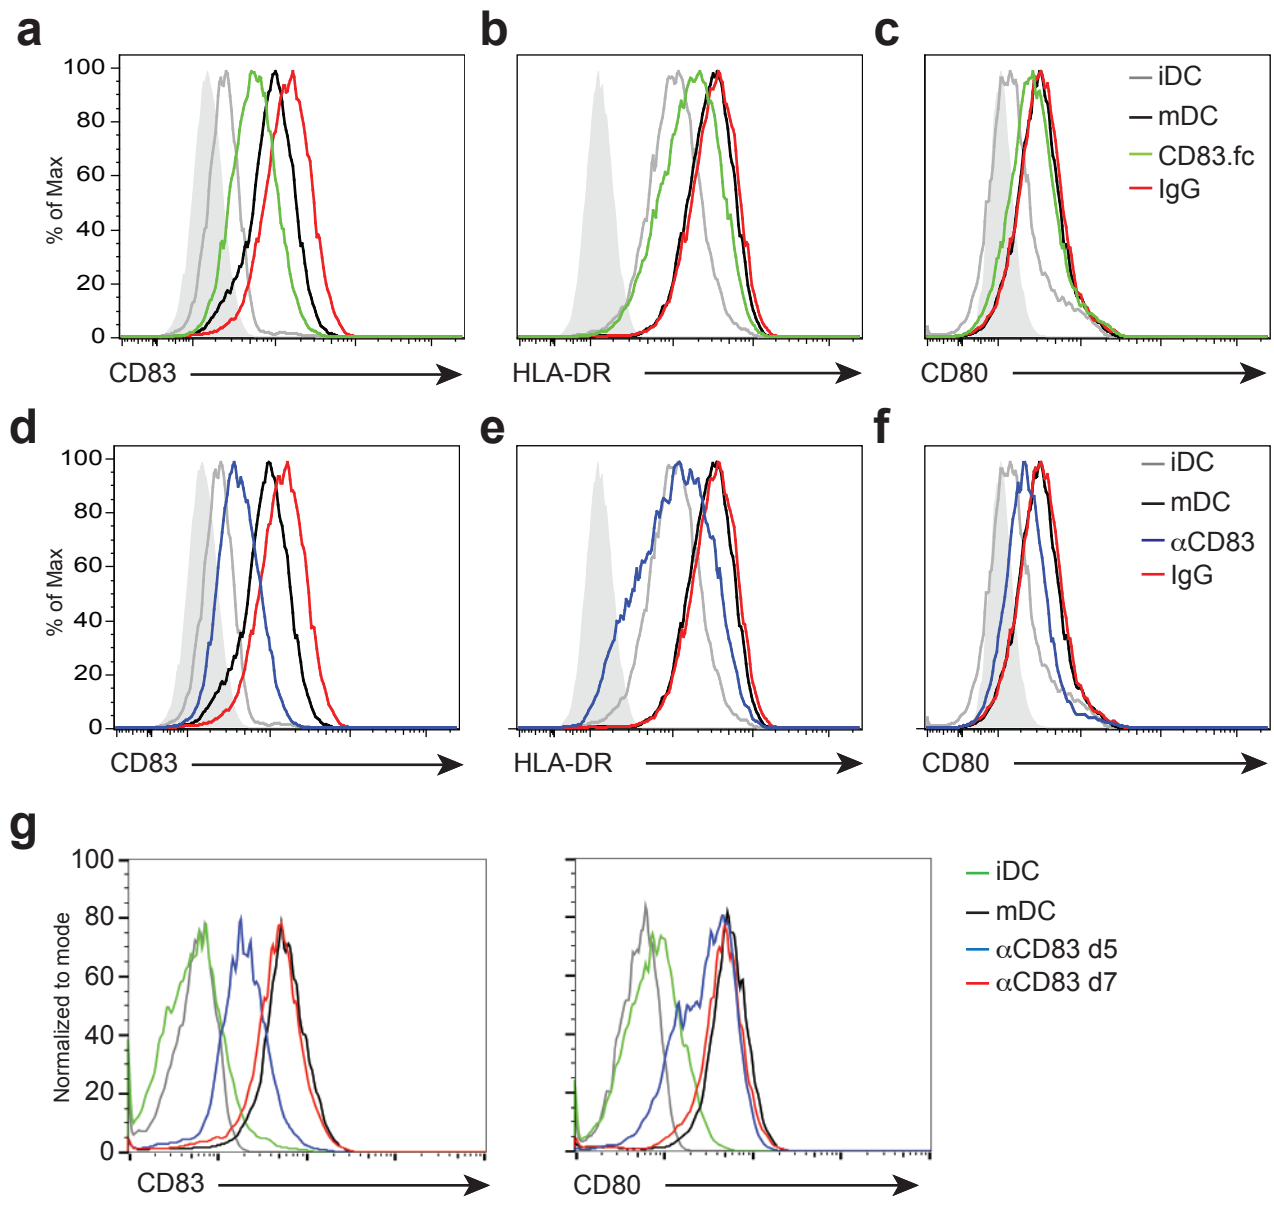

Supplement: mi201479x9.pdf [file mi201479x9.pdf]
